## CORRECTION

# Correction: Wt1 transcription factor impairs cardiomyocyte specification and drives a phenotypic switch from myocardium to epicardium

**Ines J. Marques, Alexander Ernst, Prateek Arora, Andrej Vianin, Tanja Hetke, Andrés Sanz-Morejón, Uta Naumann, Adolfo Odriozola, Xavier Langa, Laura Andrés-Delgado, Benoît Zuber, Carlos Torroja, Marco Osterwalder, Filipa C. Simões, Christoph Englert and Nadia Mercader**

There were errors in *Development* **149**, dev200375 (doi:10.1242/dev.200375).

Two supplementary tables were missing. Table S1 and Table S6 have now been included in the supplementary information and the original Tables S1-S4 have been renumbered to Tables S2-S5. The supplementary table citations have been updated.

The authors apologise to readers for these errors, which do not impact the results or conclusions of this article. Both the online full-text and PDF versions of the article have been corrected.
